# Supplementary material
Source: PubMed Central journal article supplement (PMC11028195)
Supplement: 262_2019_2343_MOESM1_ESM.pdf [file 262_2019_2343_MOESM1_ESM.pdf]

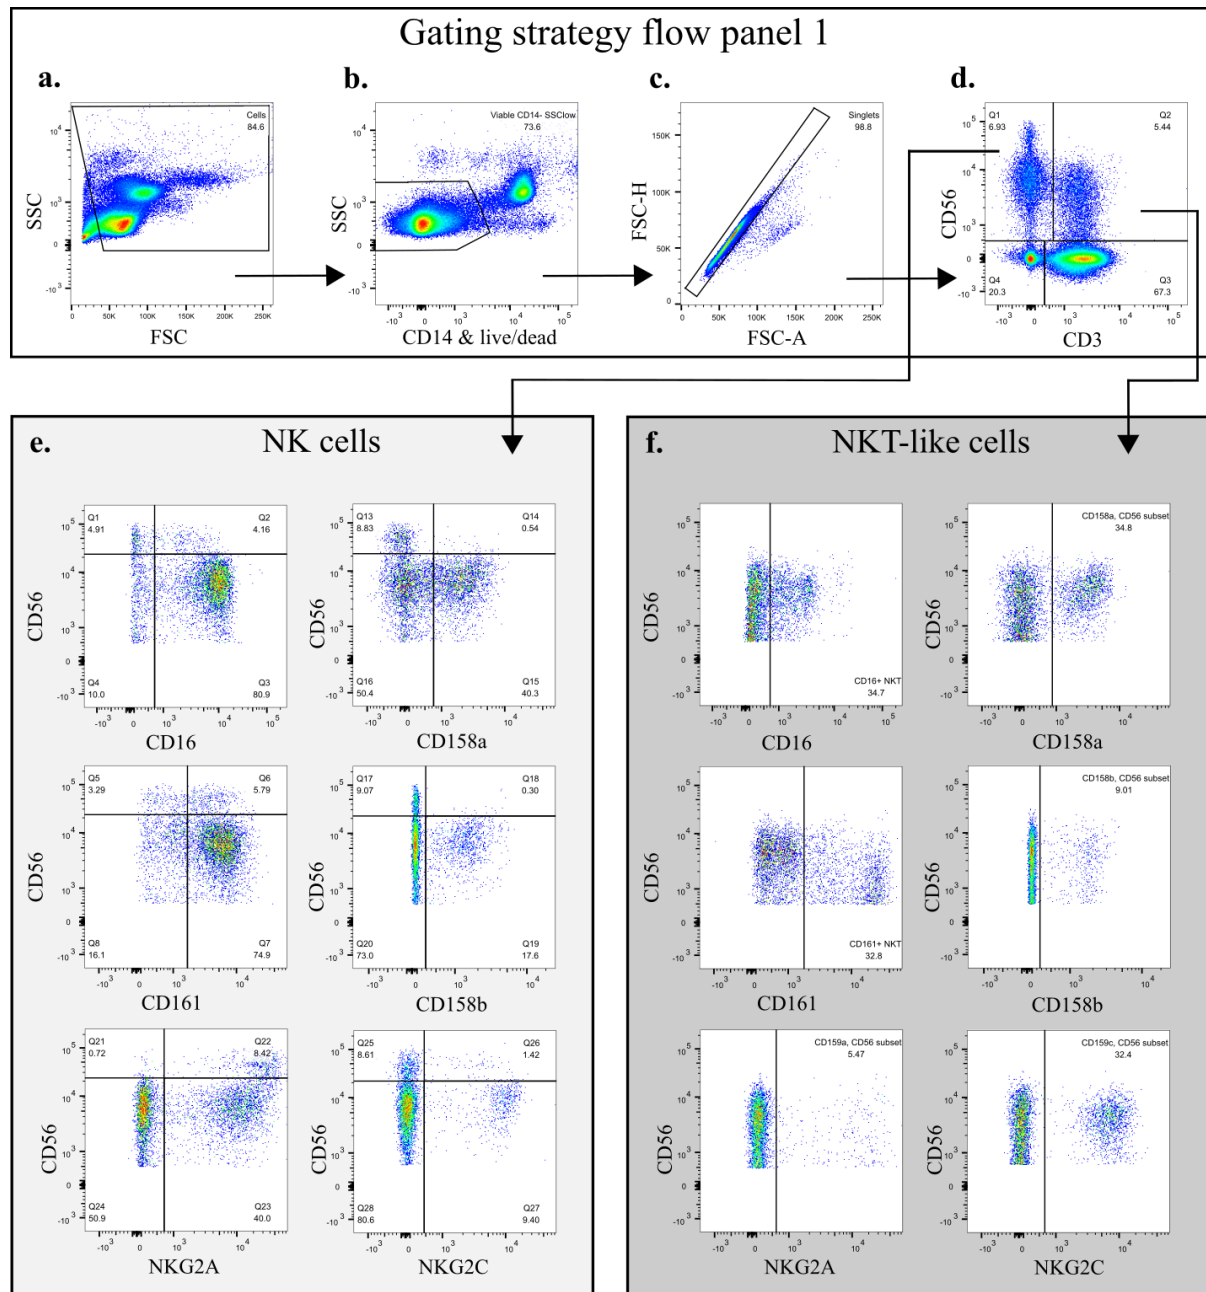

**Supplementary Fig.1** Flow cytometry gating strategy used for the identification of circulating NK cells and NKT-like cells

Two flow cytometry panels were set up in order to study the immunophenotype circulating NK cells and NKT-like cells. This figure shows the standardized gating strategy used for flow cytometry panel 1. **a.** Mononuclear cells (excluding debris (FSC<sup>low</sup>/SSC<sup>low</sup>)). **b.** Viable lymphocytes (excluding CD14<sup>+</sup> monocytes, dead cells, and SSC<sup>high</sup> cells). **c.** Single lymphocytes (excluding doublets). **d.** NK cells (CD3<sup>-</sup>CD56<sup>+</sup> cells) and NKT-like cells (CD3<sup>+</sup>CD56<sup>+</sup> cells). Percentage and expression of immunophenotypic markers were determined on the gated CD56<sup>dim</sup> and CD56<sup>bright</sup> NK cell populations **e.** and **f.** NKT cell-like population.

Abbreviations: FSC (forward scatter), SSC (side scatter).

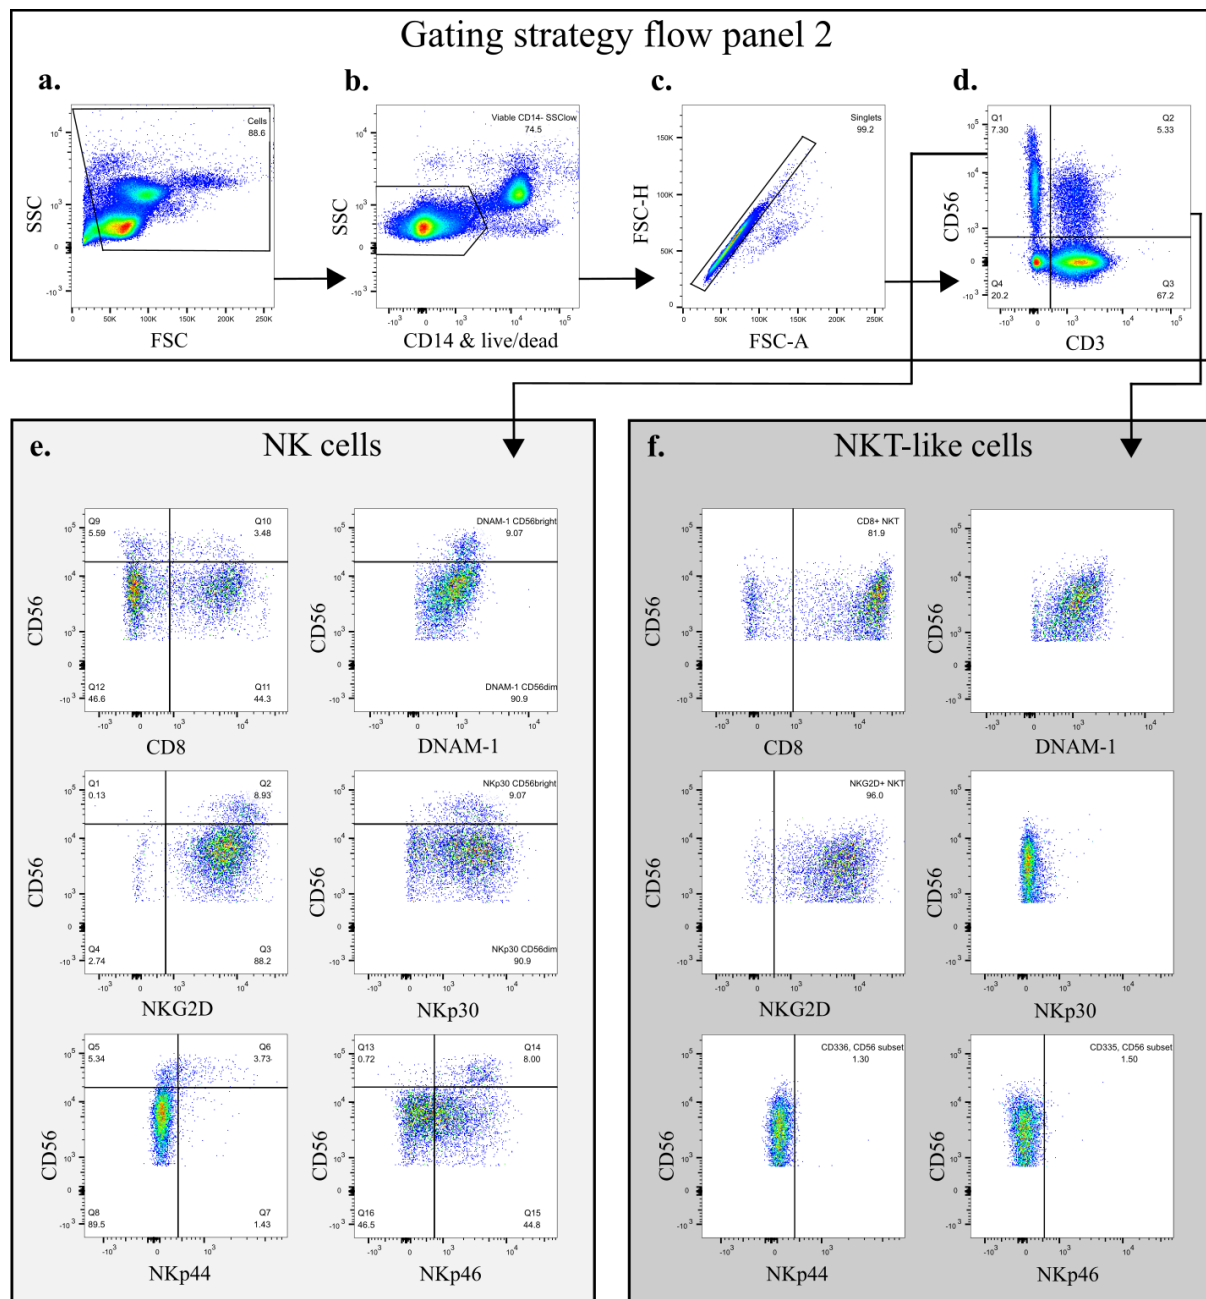

**Supplementary Fig.2** Flow cytometry gating strategy used for the identification of circulating NK cells and NKT-like cells

Two flow cytometry panels were set up in order to study the immunophenotype circulating NK cells and NKT-like cells. This figure shows the standardized gating strategy used for flow cytometry panel 2. **a.** Mononuclear cells (excluding debris (FSC<sup>low</sup>/SSC<sup>low</sup>)). **b.** Viable lymphocytes (excluding CD14<sup>+</sup> monocytes, dead cells, and SSC<sup>high</sup> cells). **c.** Single lymphocytes (excluding doublets). **d.** NK cells (CD3<sup>-</sup>CD56<sup>+</sup> cells) and NKT-like cells (CD3<sup>+</sup>CD56<sup>+</sup> cells). Percentage and expression of immunophenotypic markers were determined on the gated CD56<sup>dim</sup> and CD56<sup>bright</sup> NK cell populations **e.** and **f.** NKT cell-like population.

Abbreviations: FSC (forward scatter), SSC (side scatter).

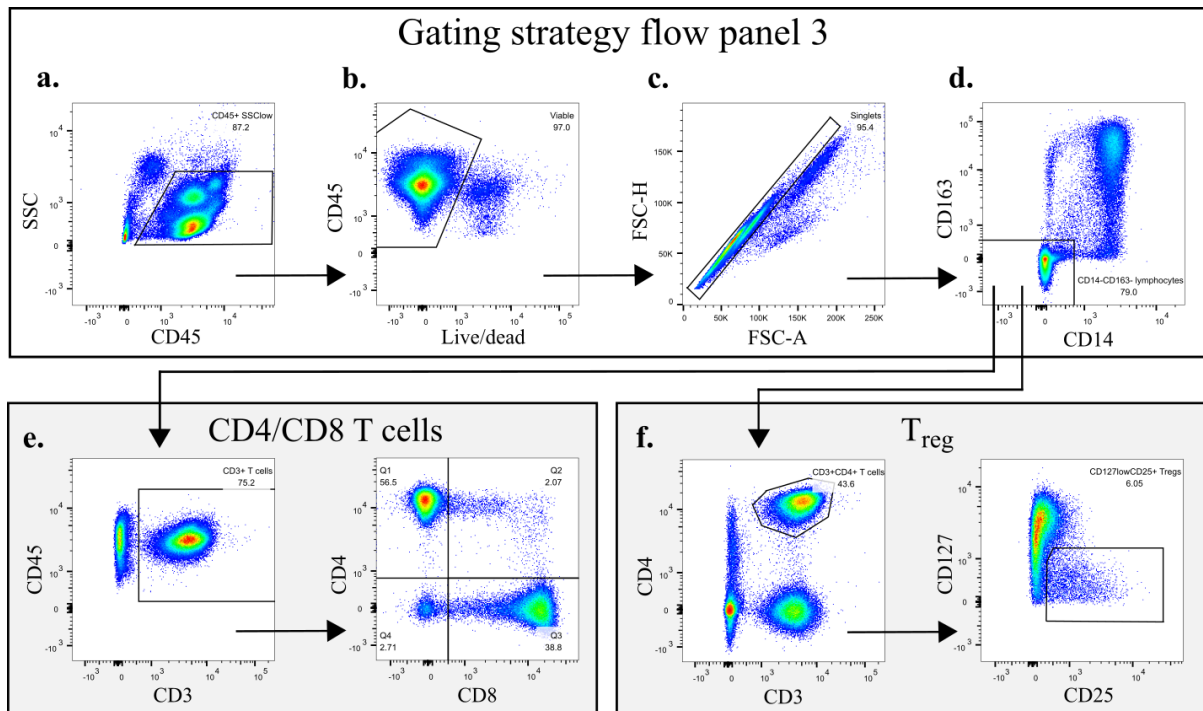

**Supplementary Fig.3** Overview of the flow cytometry gating strategy used for the identification of circulating T cell subsets

A third flow cytometry panel was set up and a standardized gating strategy was created in order to study the immunophenotype circulating T cell subsets. **a.** Mononuclear cells (excluding CD45<sup>-</sup> cells and SSC<sup>high</sup> cells). **b.** Viable mononuclear cells (excluding dead cells). **c.** Single mononuclear cells (excluding doublets). **d.** Lymphocytes (CD14<sup>-</sup>CD163<sup>-</sup> cells). **e.** T cells (CD3<sup>+</sup>), further divided into CD4<sup>+</sup> versus CD8<sup>+</sup> T cells. **f.** Helper T cells (CD3<sup>+</sup>CD4<sup>+</sup>), and their subpopulation T<sub>reg</sub> (CD127<sup>low</sup>CD25<sup>+</sup> cells).

Abbreviations: FSC (forward scatter), SSC (side scatter)



**Supplementary Table 2** *Survival analyses of CRC patients in relation to immune subset distribution and immunophenotype of circulating lymphocyte subsets*

Survival plots and univariate analyses were generated for stage II and III CRC patients (N=49) at risk of developing metastases. Stratifications were based on the median percentage of positive cells or expression of the respective immunophenotypic marker. The below-median group was used as reference group. *P*-values  $\leq 0.05$  were considered statistically significant and indicated in bold.

|                                                                                               | Kaplan Meier |              | Univariate analysis |              |              |
|-----------------------------------------------------------------------------------------------|--------------|--------------|---------------------|--------------|--------------|
|                                                                                               | Median       | P-value      | HR                  | CI           | P-value      |
| <b>Subset distribution</b>                                                                    |              |              |                     |              |              |
| <i>T</i> cells (%) <sup>*</sup>                                                               | 54.6         | 0.399        | 0.655               | 0.243-1.765  | 0.403        |
| <i>CD8</i> <sup>+</sup> <i>T</i> cells (%) <sup>*</sup>                                       | 16.6         | 0.222        | 0.536               | 0.194-1.481  | 0.230        |
| <i>CD4</i> <sup>+</sup> <i>T</i> cells (%) <sup>*</sup>                                       | 42.6         | 0.980        | 1.013               | 0.379-2.702  | 0.980        |
| <i>CD127</i> <sup>low</sup> <i>CD25</i> <sup>+</sup> <i>T</i> <sub>reg</sub> (%) <sup>*</sup> | 6.9          | 0.062        | 2.551               | 0.921-7.069  | 0.072        |
| <i>NK</i> cells (%)                                                                           | 13.3         | 0.170        | 1.661               | 0.798-3.459  | 0.175        |
| <i>CD56</i> <sup>dim</sup> <i>NK</i> cells (%)                                                | 96.7         | 0.585        | 1.226               | 0.589-2.550  | 0.586        |
| <i>CD56</i> <sup>bright</sup> <i>NK</i> cells (%)                                             | 3.3          | 0.380        | 0.719               | 0.343-1.507  | 0.382        |
| <i>NKT</i> -like cells (%)                                                                    | 4.4          | 0.436        | 1.335               | 0.644-2.767  | 0.438        |
| <b><i>CD56</i><sup>dim</sup> <i>NK</i> cells</b>                                              |              |              |                     |              |              |
| <i>CD16</i> <sup>+</sup> (%)                                                                  | 83.4         | 0.412        | 1.358               | 0.652-2.830  | 0.413        |
| <i>CD158a</i> <sup>+</sup> (%)                                                                | 29.9         | 0.832        | 0.832               | 0.443-1.926  | 0.832        |
| <i>CD158b</i> <sup>+</sup> (%)                                                                | 34.6         | 0.462        | 1.316               | 0.632-2.742  | 0.463        |
| <i>NKG2A</i> <sup>+</sup> (%)                                                                 | 47.2         | 0.948        | 0.976               | 0.470-2.025  | 0.948        |
| <i>NKG2A</i> <sup>+</sup> (MFI)                                                               | 7212         | 0.578        | 0.813               | 0.391-1.689  | 0.578        |
| <i>NKG2C</i> <sup>+</sup> (%)                                                                 | 12.9         | 0.559        | 0.804               | 0.386-1.675  | 0.560        |
| <i>NKG2C</i> <sup>+</sup> (MFI)                                                               | 2015         | 0.605        | 0.824               | 0.396-1.716  | 0.606        |
| <i>CD161</i> (MFI)                                                                            | 2670         | 0.606        | 0.825               | 0.397-1.716  | 0.606        |
| <i>CD8</i> <sup>+</sup> (%)                                                                   | 25.9         | 0.645        | 0.843               | 0.406-1.749  | 0.646        |
| <i>CD8</i> <sup>+</sup> (MFI)                                                                 | 3091         | 0.894        | 1.052               | 0.500-2.214  | 0.894        |
| <i>DNAM-1</i> (MFI)                                                                           | 555          | 0.464        | 1.313               | 0.632-2.725  | 0.465        |
| <i>NKG2D</i> <sup>+</sup> (%)                                                                 | 91.3         | 0.120        | 1.784               | 0.851-3.739  | 0.125        |
| <i>NKG2D</i> <sup>+</sup> (MFI)                                                               | 3414         | 0.841        | 1.078               | 0.517-2.248  | 0.841        |
| <i>NKp30</i> (MFI)                                                                            | 1390         | 0.180        | 1.663               | 0.785-3.525  | 0.184        |
| <i>NKp44</i> <sup>+</sup> (%)                                                                 | 0.5          | 0.910        | 1.043               | 0.500-2.175  | 0.910        |
| <i>NKp44</i> (MFI)                                                                            | 111          | 0.240        | 1.581               | 0.732-3.412  | 0.243        |
| <i>NKp46</i> <sup>+</sup> (%)                                                                 | 33.7         | 0.343        | 1.434               | 0.679-3.029  | 0.345        |
| <i>NKp46</i> (MFI)                                                                            | 452          | 0.141        | 1.768               | 0.821-3.806  | 0.146        |
| <b><i>CD56</i><sup>bright</sup> <i>NK</i> cells</b>                                           |              |              |                     |              |              |
| <i>CD16</i> <sup>+</sup> (%)                                                                  | 1.6          | 0.358        | 0.708               | 0.338-1.484  | 0.360        |
| <i>CD158a</i> <sup>+</sup> (%)                                                                | 5.2          | 0.244        | 1.540               | 0.741-3.200  | 0.248        |
| <i>CD158b</i> <sup>+</sup> (%)                                                                | 7.6          | 0.641        | 1.189               | 0.574-2.466  | 0.641        |
| <i>NKG2A</i> <sup>+</sup> (%)                                                                 | 3.2          | 0.734        | 0.881               | 0.423-1.834  | 0.734        |
| <i>NKG2A</i> <sup>+</sup> (MFI)                                                               | 17899        | 0.770        | 1.115               | 0.537-2.314  | 0.770        |
| <i>NKG2C</i> <sup>+</sup> (%)                                                                 | 0.9          | 0.414        | 0.735               | 0.351-1.541  | 0.415        |
| <i>NKG2C</i> <sup>+</sup> (MFI)                                                               | 2208         | 0.303        | 0.679               | 0.323-1.426  | 0.306        |
| <i>CD161</i> (MFI)                                                                            | 1616         | 0.683        | 0.858               | 0.413-1.786  | 0.683        |
| <i>CD8</i> <sup>+</sup> (%)                                                                   | 1.2          | 0.655        | 0.846               | 0.406-1.761  | 0.655        |
| <i>CD8</i> <sup>+</sup> (MFI)                                                                 | 2897         | 0.626        | 1.202               | 0.573-2.518  | 0.627        |
| <i>DNAM-1</i> (MFI)                                                                           | 774          | 0.232        | 1.561               | 0.748-3.259  | 0.236        |
| <i>NKG2D</i> <sup>+</sup> (%)                                                                 | 3.2          | 0.380        | 0.719               | 0.343-1.507  | 0.382        |
| <i>NKG2D</i> <sup>+</sup> (MFI)                                                               | 6342         | 0.376        | 1.394               | 0.666-2.918  | 0.378        |
| <i>NKp30</i> (MFI)                                                                            | 2327         | <b>0.042</b> | 2.143               | 1.009-4.551  | <b>0.047</b> |
| <i>NKp44</i> <sup>+</sup> (%)                                                                 | 0.9          | 0.152        | 0.581               | 0.274-1.232  | 0.157        |
| <i>NKp44</i> (MFI)                                                                            | 238          | 0.776        | 1.112               | 0.535-2.311  | 0.776        |
| <i>NKp46</i> <sup>+</sup> (%)                                                                 | 85.4         | 0.287        | 1.487               | 0.713-3.100  | 0.290        |
| <i>NKp46</i> (MFI)                                                                            | 2174         | 0.822        | 0.919               | 0.442-1.914  | 0.822        |
| <b><i>NKT</i>-like cells</b>                                                                  |              |              |                     |              |              |
| <i>CD16</i> <sup>+</sup> (%)                                                                  | 20.3         | <b>0.000</b> | 4.697               | 2.046-10.783 | <b>0.000</b> |
| <i>CD158a</i> <sup>+</sup> (%)                                                                | 5.1          | 0.068        | 1.969               | 0.937-4.136  | 0.074        |
| <i>CD158b</i> <sup>+</sup> (%)                                                                | 9.2          | 0.163        | 1.684               | 0.803-3.531  | 0.167        |
| <i>NKG2A</i> <sup>+</sup> (%)                                                                 | 18.3         | 0.108        | 1.823               | 0.868-3.829  | 0.113        |
| <i>NKG2A</i> <sup>+</sup> (MFI)                                                               | 2472         | 0.780        | 1.110               | 0.533-2.315  | 0.780        |
| <i>NKG2C</i> <sup>+</sup> (%)                                                                 | 10.7         | 0.462        | 1.314               | 0.634-2.726  | 0.463        |
| <i>NKG2C</i> <sup>+</sup> (MFI)                                                               | 1455         | 0.459        | 1.318               | 0.633-2.742  | 0.460        |
| <i>CD161</i> (MFI)                                                                            | 1630         | 0.682        | 0.858               | 0.413-1.784  | 0.682        |
| <i>CD8</i> <sup>+</sup> (%)                                                                   | 75.9         | 0.442        | 1.332               | 0.640-2.775  | 0.444        |
| <i>CD8</i> <sup>+</sup> (MFI)                                                                 | 12934        | 0.523        | 1.268               | 0.611-2.632  | 0.524        |
| <i>DNAM-1</i> (MFI)                                                                           | 765          | 0.603        | 1.215               | 0.582-2.534  | 0.604        |
| <i>NKG2D</i> <sup>+</sup> (%)                                                                 | 92.9         | 0.696        | 1.157               | 0.556-2.409  | 0.697        |
| <i>NKG2D</i> <sup>+</sup> (MFI)                                                               | 4704         | 0.394        | 1.385               | 0.653-2.940  | 0.396        |
| <i>NKp30</i> (MFI)                                                                            | 182          | 0.784        | 1.108               | 0.532-2.308  | 0.784        |
| <i>NKp44</i> <sup>+</sup> (%)                                                                 | 1.2          | 0.221        | 1.591               | 0.751-3.370  | 0.225        |
| <i>NKp44</i> (MFI)                                                                            | 114          | 0.380        | 1.394               | 0.662-2.937  | 0.382        |

|                              |      |       |       |             |       |
|------------------------------|------|-------|-------|-------------|-------|
| <i>NKp46<sup>+</sup> (%)</i> | 3.6  | 0.316 | 0.319 | 0.698-3.024 | 0.319 |
| <i>NKp46 (MFI)</i>           | 53.4 | 0.563 | 1.240 | 0.598-2.572 | 0.564 |

\*T cells were investigated in 25 CRC patients at risk of developing metastases
